# Supplementary material
Source: ML conference proceedings conference paper supplement (https://openreview.net/forum?id=K1Uzj8tuwd)
Supplement: supplementary_material [file attachment]

# Learning Mask-aware CLIP Representations for Zero-Shot Segmentation

(Supplementary material)

Anonymous Author(s)

Affiliation

Address

email

1 In the supplementary material, we first introduce technical details of the "frozen CLIP" approaches in  
 2 Sec. 1. Then the dataset settings are shown in Sec. 2. Moreover, we provide additional qualitative  
 3 results in Sec. 3.

## 1 Technical details of the "frozen CLIP" approaches

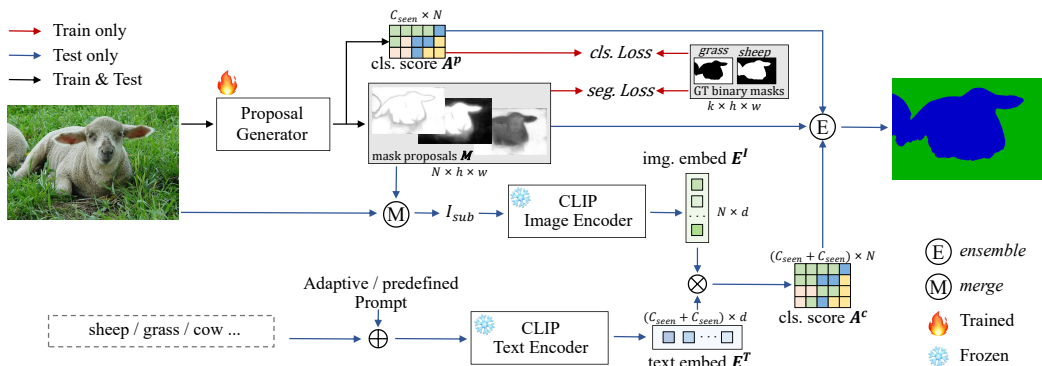

Figure 1: Overview of the "decoupling-paradigm".

5 Fig. 1 presents an overview of the "frozen CLIP" approach. **During training**, a standard MaskFormer  
 6 or Mask2Former is used as Proposal Generator to generate  $N$  mask proposals ( $M$ ,  $M \in \mathbb{R}^{N \times h \times w}$ )  
 7 and classification score ( $A^p$ ,  $A^p \in \mathbb{R}^{N \times |C_{seen}|}$ ). **During testing**, the input image is merged with  $M$   
 8 to obtain  $N$  sub-images ( $I_{sub}$ ,  $I_{sub} \in \mathbb{R}^{N \times \hat{h} \times \hat{w}}$ ). These sub-images are fed into a frozen CLIP to get  
 9 the CLIP classification score ( $A^c$ ,  $A^c \in \mathbb{R}^{N \times |C_{seen} \cup C_{unseen}|}$ ). Here  $C_{seen}$  and  $C_{unseen}$  represent a  
 10 set of seen classes and unseen classes. An *ensemble* operation is used to ensemble  $A^p$  and  $A^c$  for the  
 11 final prediction. The *merge* and the *ensemble* operations will be introduced in detail in following:

12 **Merge operation.** To generate appropriate sub-images based on mask proposals, [2] presents three  
 13 different *merge* operations: 1) mask, 2) crop, 3) mask & crop. Through experimentation, they  
 14 demonstrate that the mask & crop option yields the best results. Figure 2 provides an example of  
 15 these operations. It's worth noting that all sub-images are resized to  $\hat{h} \times \hat{w}$ , here  $\hat{h}$  and  $\hat{w}$  typically  
 16 take a value of 224, which is the default input size of CLIP Image Encoder. Although acceptable  
 17 results can be obtained with the *merge* operation, it involves repeatedly feeding images into CLIP,  
 18 which leads to significant computational redundancy.

19 **Ensemble operation.** Comparatively,  $A^p$  provides higher confidence classification scores for the  
 20 seen classes and  $A^c$  provides higher confidence classification scores for the unseen classes. Therefore,

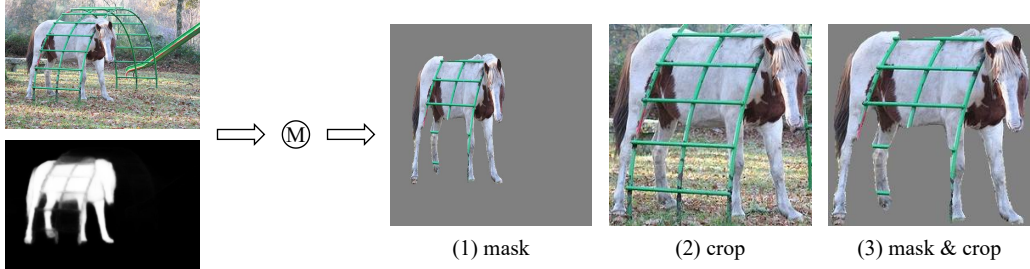

Figure 2: Comparison among three *merge* operations.

21 an ensemble of  $A^p$  and  $A^c$  achieves better results. The *ensemble* operation can be formulated as:

$$\hat{A}(c) = \begin{cases} A^p(c)^\lambda \cdot A^c(c)^{(1-\lambda)}, & c \in C^{seen} \\ A^c(c)^\lambda & , c \in C^{unseen} \end{cases} \quad (1)$$

22 here a geometry mean of  $A^p$  and  $A^c$  is calculated (dubbed as  $\hat{A}$ ), and the contribution of both  
 23 classification scores is balanced by  $\lambda$ . As per literature [2, 7, 6],  $\lambda$  usually takes values from 0.6 to 0.8.  
 24 Therefore, the final output ( $O$ ,  $O \in \mathbb{R}^{|C^{seen} \cup C^{unseen}| \times h \times w}$ ) can be obtained by matrix multiplication:  
 25  $O = \hat{A}^T \cdot M$ . With the *ensemble* operation, the classification results of seen classes primarily depend  
 26 on  $A^p$ , whereas the classification results of unseen classes mainly rely on  $A^c$ .

## 27 2 Dataset

28 We follow [1, 3, 5, 2, 7] to conduct experiments on three benchmarks of the popular *zero-shot* setting,  
 29 Pascal-VOC, COCO-Stuff and ADE20K, to evaluate the performance of MAFT. Additionally, we  
 30 evaluate MAFT on the *cross-dataset* setting [4, 7], *i.e.*, training on COCO-Stuff and testing on  
 31 ADE20K, Pascal-Context, and Pascal-VOC.

- 32 • **COCO-Stuff**: COCO-Stuff is a large-scale semantic segmentation dataset that includes 171  
 33 classes. For the *zero-shot* setting [2, 7, 6], it is divided into 156 seen classes for training  
 34 and 15 unseen classes for testing. For the *cross-dataset* setting, all 171 classes are used for  
 35 training.
- 36 • **Pascal-VOC**: There are 10582 images for training and 1,449 images for testing. For the  
 37 *zero-shot* setting, Pascal-VOC is split into 15 seen classes and 5 unseen classes. For the  
 38 *cross-dataset* setting, all 20 classes are used for evaluation (dubbed as PAS-20).
- 39 • **ADE20K**: ADE20K contains 25k images for training and 2k images for validation. For the  
 40 *zero-shot* setting, we follow [2] to choose 847 classes present in both training and validation  
 41 sets, and split them into 572 seen and 275 unseen classes. For the *cross-dataset* setting, we  
 42 use two settings of ADE20K: 150 classes (dubbed as A-150) and 847 classes (dubbed as  
 43 A-847).
- 44 • **Pascal-Context** is an extensive dataset of Pascal-VOC 2010. Two versions are used for  
 45 *cross-dataset* setting, one with 59 frequently used classes (dubbed as PC-59) and another  
 46 with the whole 459 classes (dubbed as PC-459).

## 47 3 Visualization

48 We provide more qualitative results, including typical proposals and top-5  $A^c$  (Fig. 3), as well as  
 49 examples of models train on COCO-Stuff and text on A-847 (Fig. 4), A-150 (Fig. 5), PC-459 (Fig.  
 50 6), PC-59 (Fig. 7), Pascal-VOC (Fig. 8), and COCO-Stuff (Fig. 9).

51 **Typical Proposals and Top-5  $A^c$** . Fig. 3 shows frozen CLIP and mask-aware CLIP classifications  
 52 of typical proposals. In the 2<sup>nd</sup> column, we provide high-quality proposals of *thing* classes. Both  
 53 the frozen CLIP and mask-aware CLIP provide high classification scores for the correct classes. In  
 54 the 3<sup>rd</sup> column, we provide proposals that only contain part of the objects (row 1-3), and proposals  
 55 containing more than 1 class (row 4). The mask-aware CLIP provides more proper results compared

56 to the frozen CLIP. In the 4<sup>th</sup> column, we provide some high-quality background proposals. The  
 57 frozen CLIP typically gives incorrect predictions, but the mask-aware CLIP assigns high scores for  
 58 the correct classes.

59 **Qualitative Analysis.** Fig. 4,5,6,7,8,9 show segmentation results on Pascal-VOC, COCO-Stuff,  
 60 ADE20K. In Pascal-VOC dataset (Fig. 8), which only contains 20 *thing* classes, the FreeSeg+MAFT  
 61 model tends to assign background regions to the similar *thing* classes, e.g., "train" in row 1, "potted-  
 62 plant" in row3-4. "boat" in row 8. In A-847, A-150, PC-459, PC-59 and COCO-Stuff datasets, both  
 63 seen classes and unseen classes exist in the input images, the FreeSeg+MAFT model generates better  
 segmentation results compared to FreeSeg.

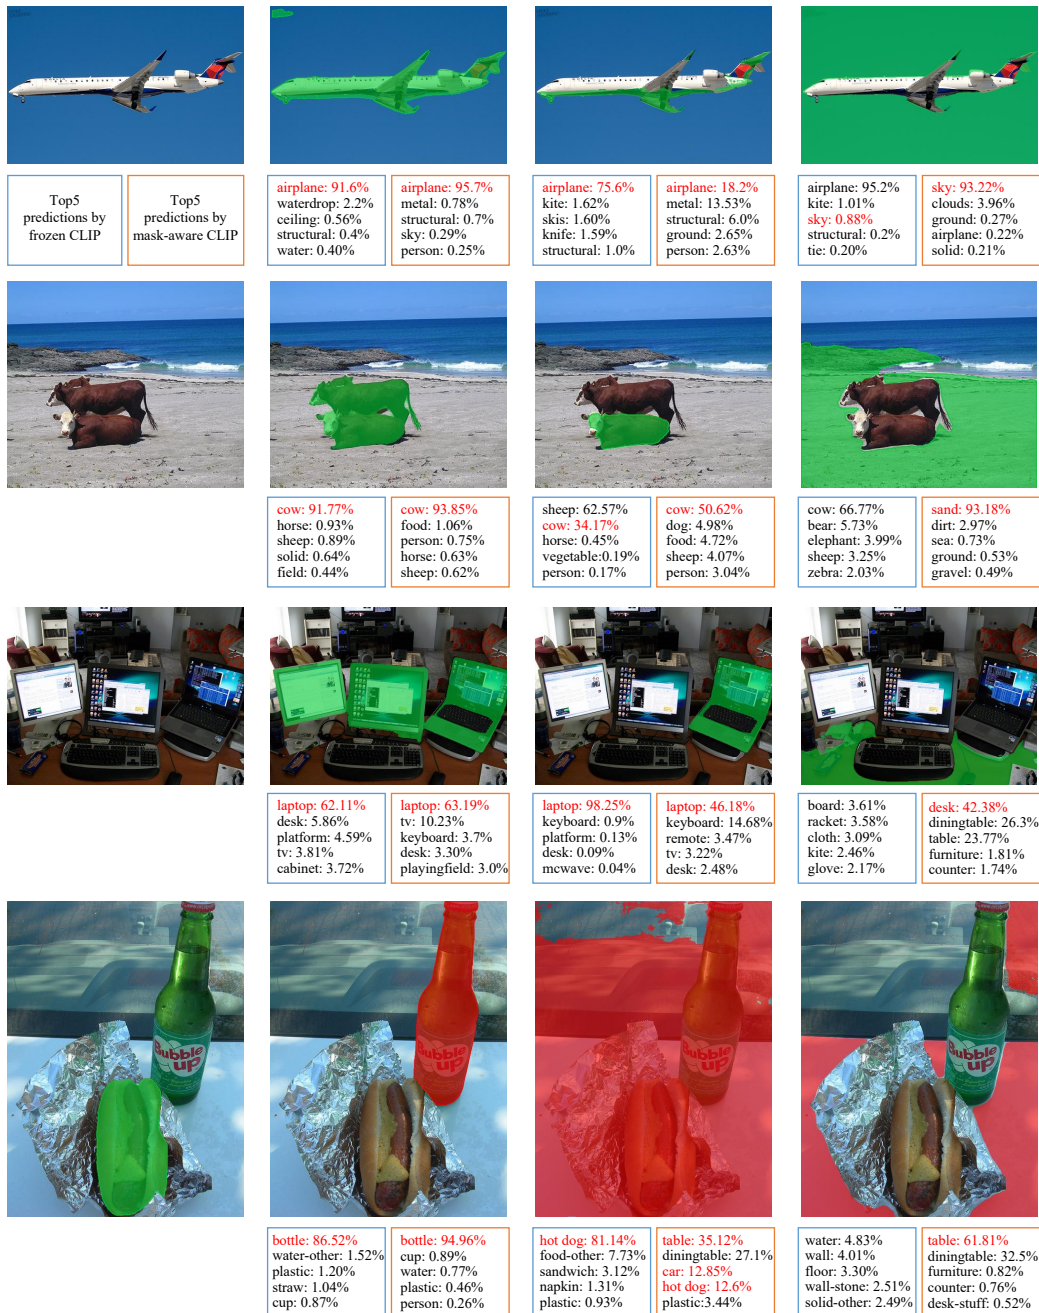

Figure 3: Visualizations of typical proposals top 5 A<sup>c</sup> by frozen CLIP and mask-aware CLIP. The correct classes are highlighted in red.

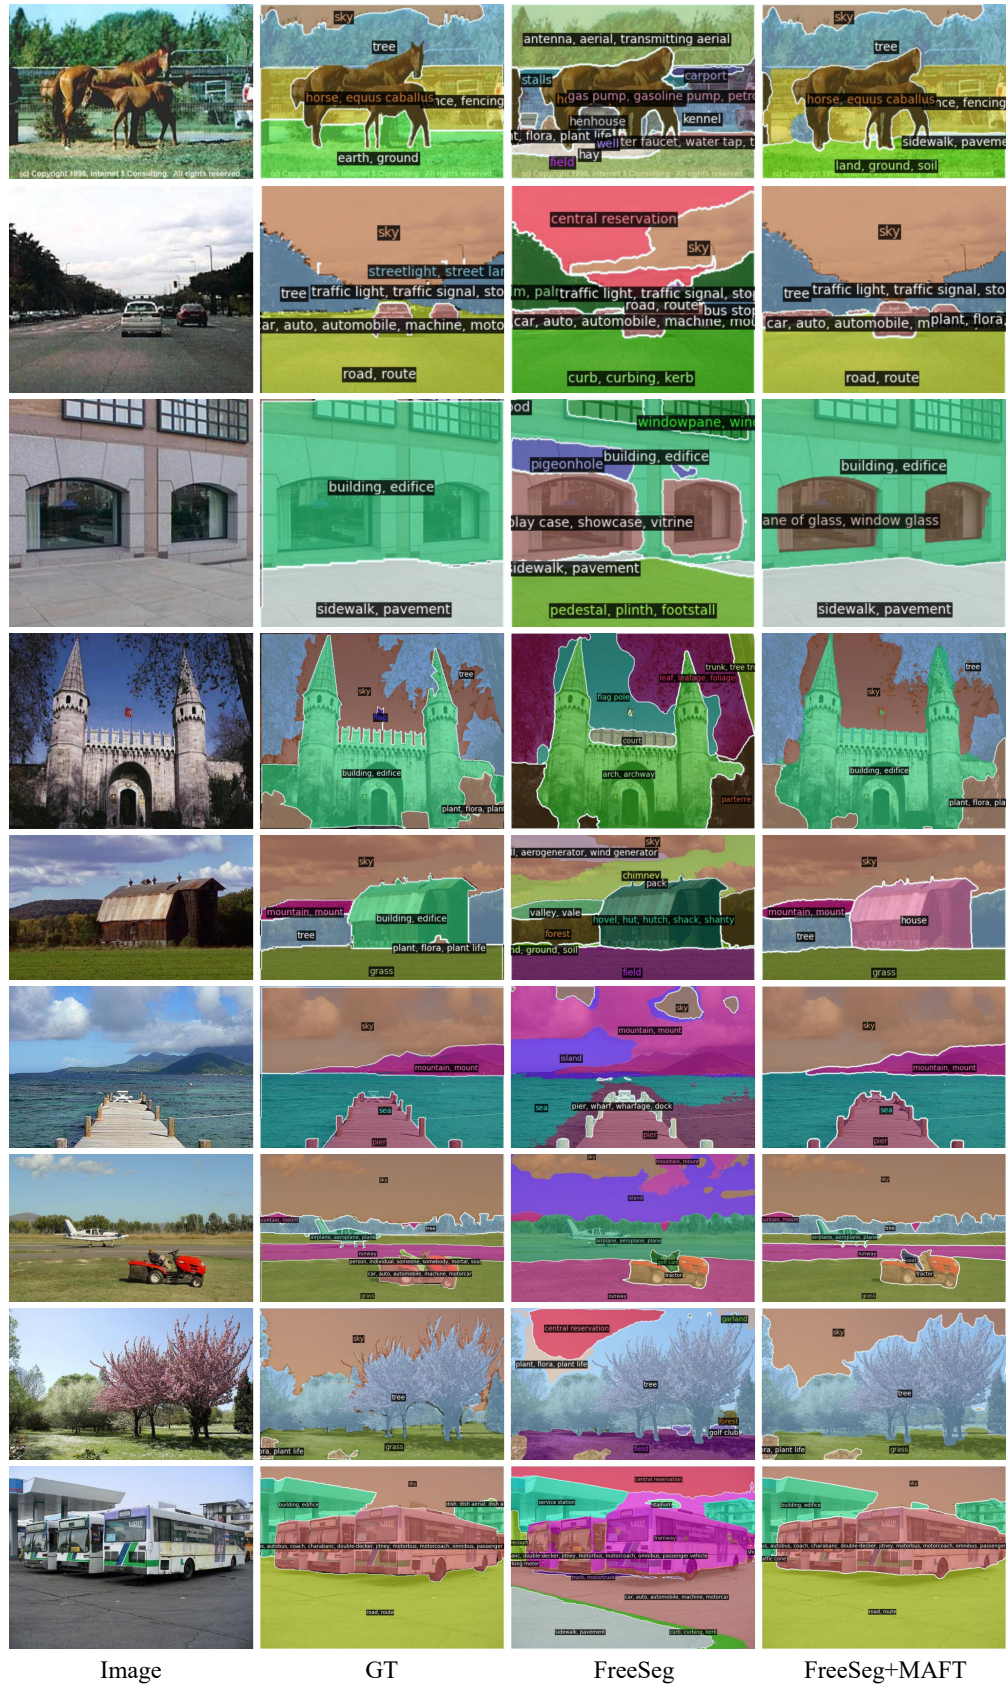

Figure 4: Qualitative results on A-847, using 847 class names in ADE20K to generate text embeddings.



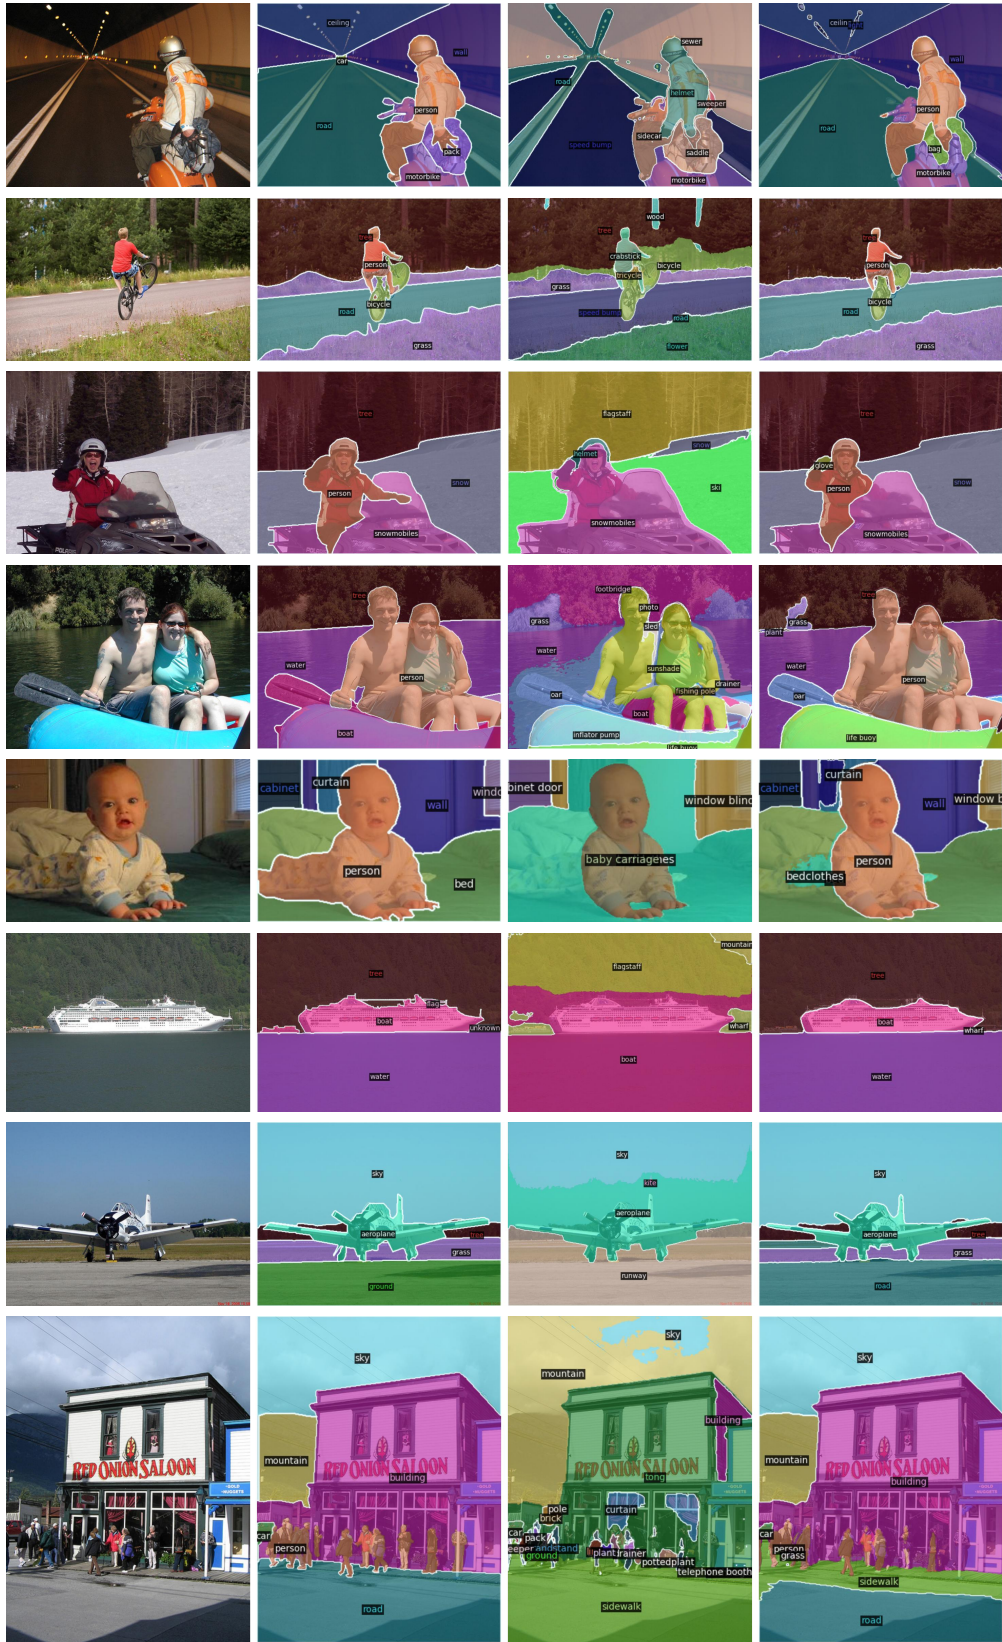

Image

GT

FreeSeg

FreeSeg+MAFT

Figure 6: Qualitative results on PC-459, using 459 class names in Pascal-Context to generate text embeddings.

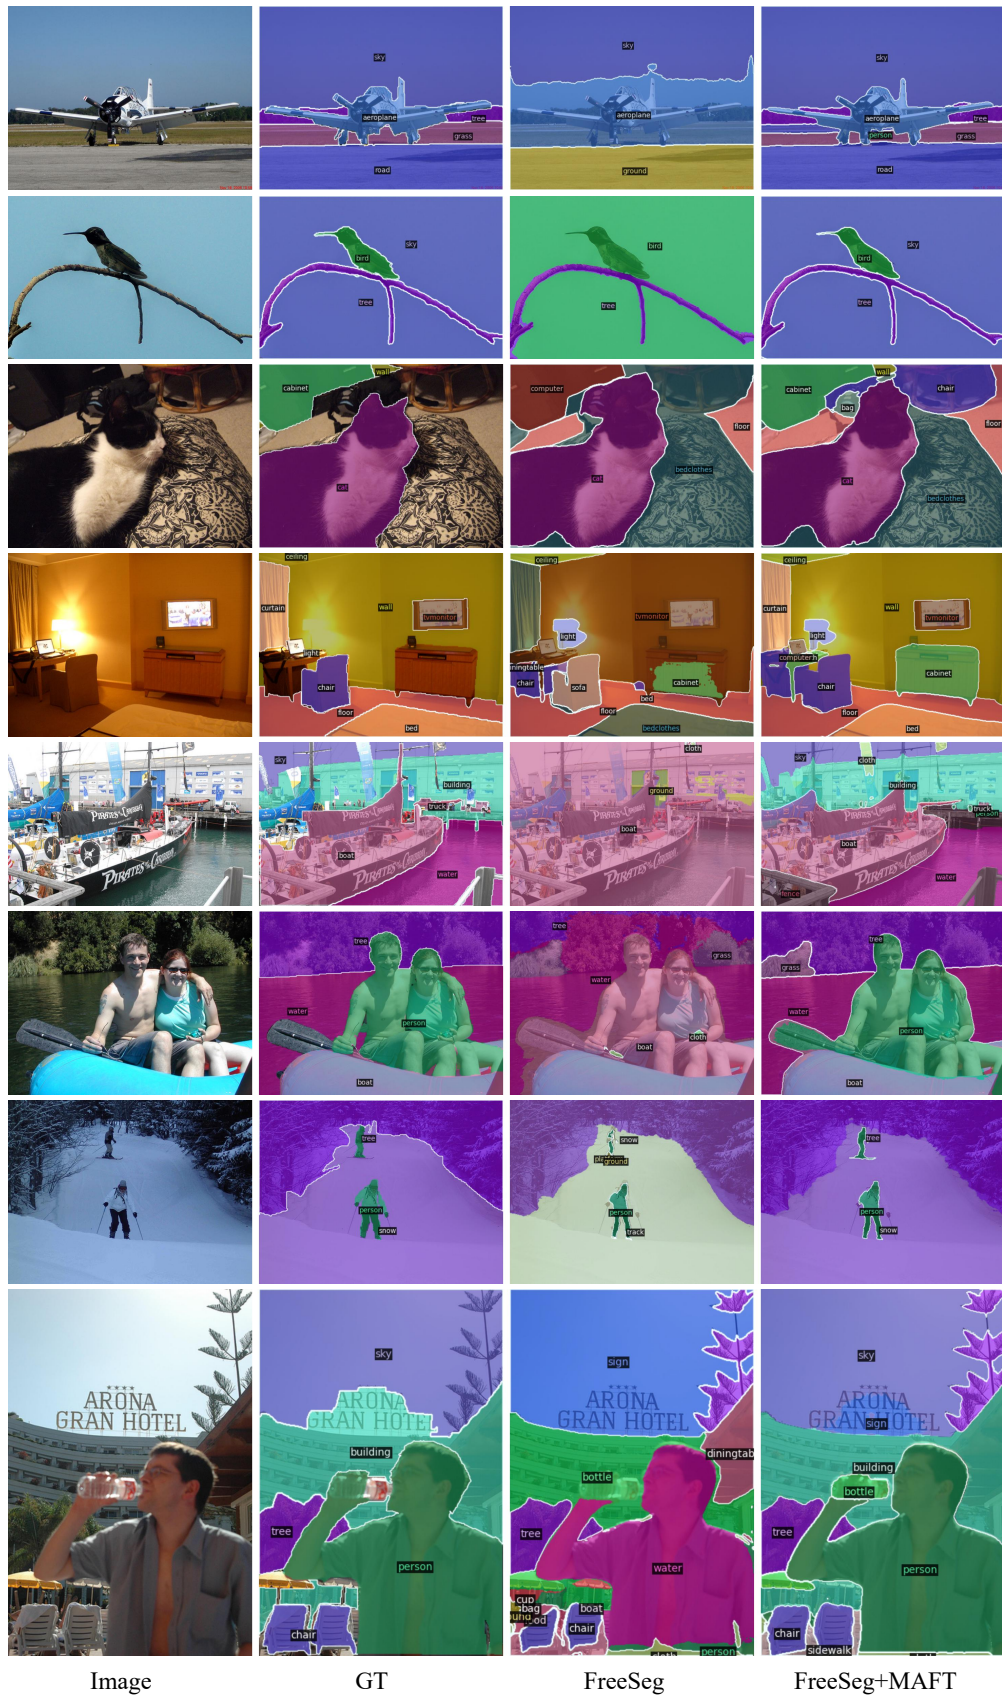

Figure 7: Qualitative results on PC-59, using 59 class names in Pascal-Context to generate text embeddings.

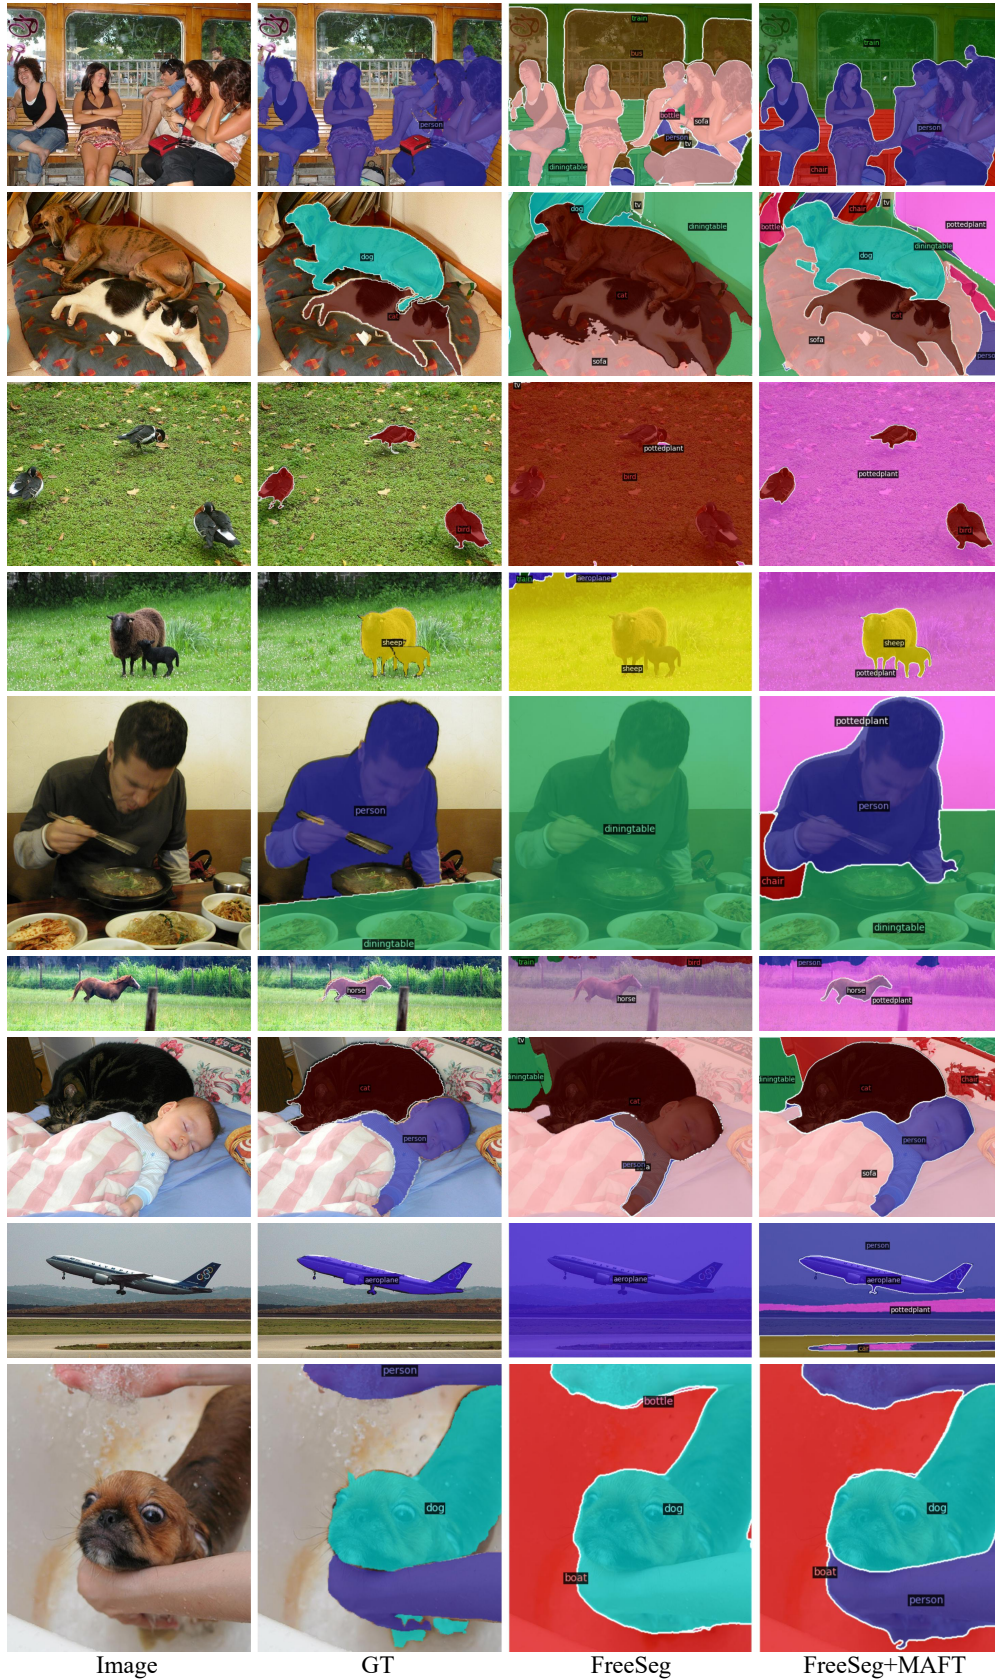

Figure 8: Qualitative results on Pascal-VOC, using 20 class names in Pascal-VOC to generate text embeddings.



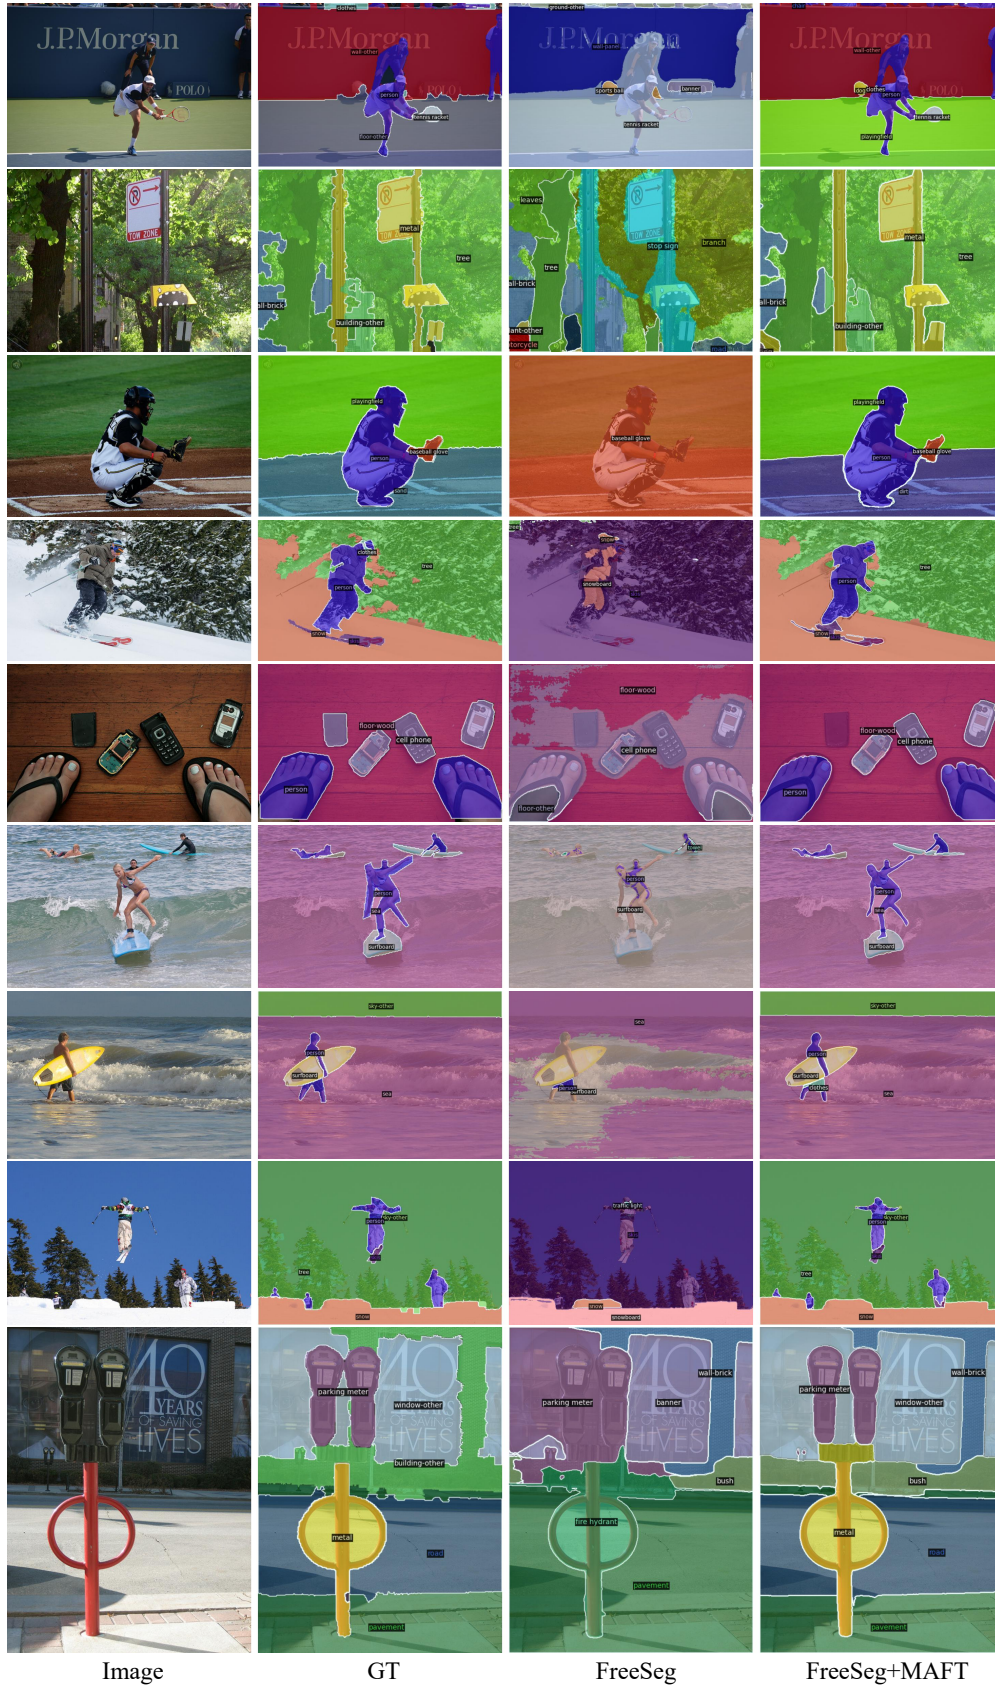

Figure 9: Qualitative results on COCO, using 171 class names in COCO-Stuff to generate text embeddings.

65 **References**

- 66 [1] Maxime Bucher, Tuan-Hung Vu, Matthieu Cord, and Patrick Pérez. Zero-shot semantic segmen-  
67 tation. *Advances in Neural Information Processing Systems*, 32, 2019.
- 68 [2] Jian Ding, Nan Xue, Gui-Song Xia, and Dengxin Dai. Decoupling zero-shot semantic segmen-  
69 tation. In *Proceedings of the IEEE/CVF Conference on Computer Vision and Pattern Recognition*,  
70 pages 11583–11592, 2022.
- 71 [3] Zhangxuan Gu, Siyuan Zhou, Li Niu, Zihan Zhao, and Liqing Zhang. Context-aware feature  
72 generation for zero-shot semantic segmentation. In *Proceedings of the 28th ACM International  
73 Conference on Multimedia*, pages 1921–1929, 2020.
- 74 [4] Feng Liang, Bichen Wu, Xiaoliang Dai, Kunpeng Li, Yinan Zhao, Hang Zhang, Peizhao Zhang,  
75 Peter Vajda, and Diana Marculescu. Open-vocabulary semantic segmentation with mask-adapted  
76 clip. *arXiv preprint arXiv:2210.04150*, 2022.
- 77 [5] Giuseppe Pastore, Fabio Cermelli, Yongqin Xian, Massimiliano Mancini, Zeynep Akata, and Bar-  
78 bara Caputo. A closer look at self-training for zero-label semantic segmentation. In *Proceedings  
79 of the IEEE/CVF Conference on Computer Vision and Pattern Recognition*, pages 2693–2702,  
80 2021.
- 81 [6] Jie Qin, Jie Wu, Pengxiang Yan, Ming Li, Ren Yuxi, Xuefeng Xiao, Yitong Wang, Rui Wang,  
82 Shilei Wen, Xin Pan, et al. Freeseg: Unified, universal and open-vocabulary image segmentation.  
83 *arXiv preprint arXiv:2303.17225*, 2023.
- 84 [7] Mengde Xu, Zheng Zhang, Fangyun Wei, Yutong Lin, Yue Cao, Han Hu, and Xiang Bai. A  
85 simple baseline for open-vocabulary semantic segmentation with pre-trained vision-language  
86 model. In *Computer Vision–ECCV 2022: 17th European Conference, Tel Aviv, Israel, October  
87 23–27, 2022, Proceedings, Part XXIX*, pages 736–753. Springer, 2022.
